# Supplementary material for: A high-throughput single-cell analysis of human CD8+ T cell functions reveals discordance for cytokine secretion and cytolysis
Source: JCI journal article supplement (doi:10.1172/jci58653), 2011-10-03
Supplement: sd1 [file 1]

## SUPPLEMENTAL FIGURES AND TABLE FOR

### Measurements of human CD8+ T-cell functions using high-throughput integrated single-cell analysis

Navin Varadarajan<sup>1,2\*</sup>, Boris Julg<sup>3,\*</sup>, Yvonne J. Yamanaka<sup>4</sup>, Huabiao Chen<sup>3,5</sup>,  
Adebola O. Ogunniyi<sup>1</sup>, Elizabeth McAndrew<sup>3</sup>, Lindsay C. Porter<sup>3</sup>, Alicja Piechocka-Trocha<sup>3,5</sup>,  
Brenna J. Hill<sup>6</sup>, Daniel C. Douek<sup>6</sup>, Florencia Pereyra<sup>3</sup>,  
Bruce D. Walker<sup>3,5</sup>, and J. Christopher Love<sup>1,3,7†</sup>

<sup>1</sup>*Department of Chemical Engineering, Massachusetts Institute of Technology,  
77 Massachusetts Ave., Cambridge, MA 02139, USA*

<sup>2</sup>*Current address: Department of Chemical & Biomolecular Engineering,  
University of Houston, Houston, TX 77204, USA*

<sup>3</sup>*The Ragon Institute of MGH, MIT, and Harvard  
Charlestown Navy Yard, Boston, MA 02129, USA*

<sup>4</sup>*Department of Biological Engineering, Massachusetts Institute of Technology,  
77 Massachusetts Ave., Cambridge, MA 02139, USA*

<sup>5</sup>*Howard Hughes Medical Institute, Chevy Chase, MD 20815, USA*

<sup>6</sup>*Human Immunology Section, Vaccine Research Center, National Institutes of Allergy and  
Infectious Diseases, National Institutes of Health, Bethesda, MD 20892, USA*

<sup>7</sup>*The Eli and Edythe L. Broad Institute, Seven Cambridge Center, Cambridge, MA 02142, USA*

\* These authors contributed equally to this work.

|                    |    | Targets per well   |      |      |     |     |                    |
|--------------------|----|--------------------|------|------|-----|-----|--------------------|
|                    |    | 1                  | 2    | 3    | 4   | 5+  |                    |
| Effectors per well | 1  | 5437               | 2748 | 1067 | 352 | 117 | E:T = 1:n<br>9,721 |
|                    | 2  | 1253               | 517  | 123  | 36  | 4   |                    |
|                    | 3  | 232                | 78   | 23   | 6   | 0   |                    |
|                    | 4  | 45                 | 8    | 0    | 0   | 0   |                    |
|                    | 5+ | 9                  | 0    | 4    | 1   | 0   |                    |
|                    |    | E:T = n:1<br>6,796 |      |      |     |     |                    |

**Supplemental Figure 1. Distribution of effectors and targets in individual 50 μm x 50 μm x 50 μm microwells.** A density matrix indicating the number of wells containing at least a single B-cell target and a single CD8+ T-cell. The arrays comprise 84,672 microwells in total. The conditions for loading the arrays were chosen to maximize the number of wells occupied with E:T=1:1. These data are representative of typical distributions measured; data shown here are from a clinical sample (CTR40).

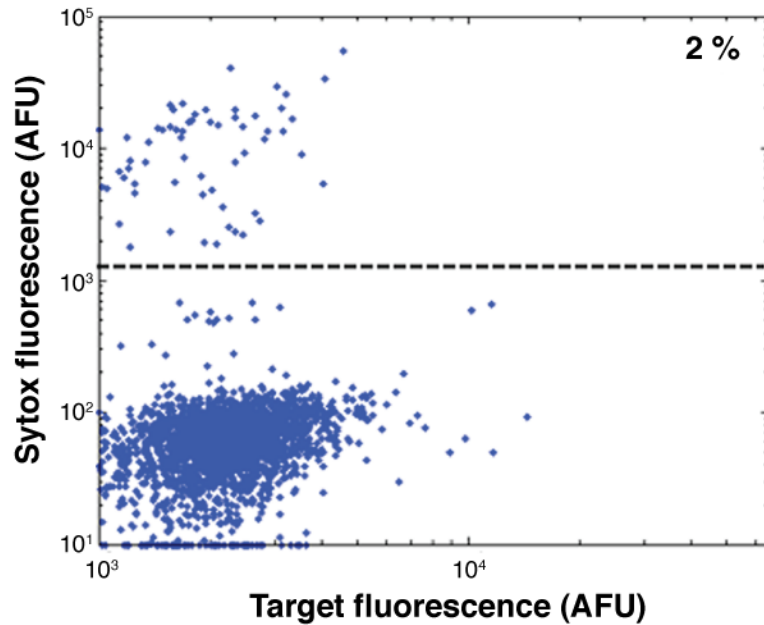

**Supplemental Figure 2. Spontaneous loss of viability for target B-cells.** Scatterplot of the percentage of dead (SYTOX) KK10-loaded, labeled B-cell targets observed in arrays of microwells in the absence of effector cells (B27-restricted T cell clones). The dashed line indicates the threshold for dead cells. These data are representative of at least three independent experiments.

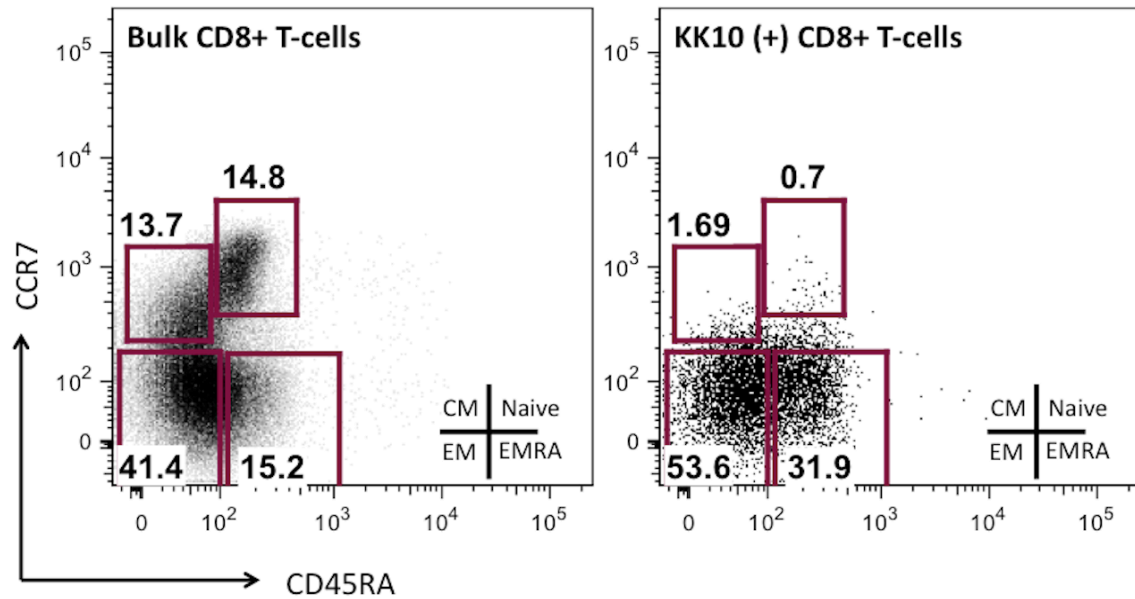

**Supplemental Figure 3. Differentiated phenotypes of bulk and KK10 tetramer (+) CD8+ T-cells from Fw056 determined by flow cytometry.** The state of differentiation was assessed by the surface expression of CCR7 and CD45RA, measured using fluorescent antibodies directed against these proteins and profiled on the flow-cytometer: EM = effector-memory (CD45RA<sup>-</sup>/CCR7<sup>-</sup>); CM = central-memory (CD45RA<sup>-</sup>/CCR7<sup>+</sup>); N = Naïve (CD45RA<sup>+</sup>/CCR7<sup>+</sup>); EMRA = effector-memory RA (CD45RA<sup>+</sup>/CCR7<sup>-</sup>). The relative percentages of each are indicated.

**Supplemental Table 1.** Clonotypic analysis of three B27-KK10-specific T-cell clones generated by screening cytolytic activity.

| <b>Clone</b> | <b>V region</b> | <b>CDR3 Sequence</b>         | <b>J region</b> |
|--------------|-----------------|------------------------------|-----------------|
| FW056 #2     | TRBV6-5*01      | CASRPGQGATEAFFGQGTRLTVV      | TRBJ1-1         |
|              | TRAV30          | AGRTAVLPR_SLDQGP             | N/A             |
| FW056 #3     | TRBV20-1*01     | CSARDRGTREVADNYGYTFGSGTRLTVV | TRBJ1-2         |
|              | TRBV15*01       | CATSETGTTLEQYFGPGTRLTVT      | TRBJ2-7         |
|              | TRAV14/DV4      | CAMREVSSGNTGKLIFGQGTTLQVKP   | TRAJ37          |
| FW056 #4     | TRBV4-3*01      | CASRPGLASNEQFFGPGTRLTVL      | TRBJ2-1         |
|              | TRAV14/DV4      | CAMSPATARQLTFGSGTQLTVLP      | TRAJ22          |
|              | TRAV8-2         | CPSYRDDKIIFGKGTRLHILP        | TRAJ30          |

\_ = not determined

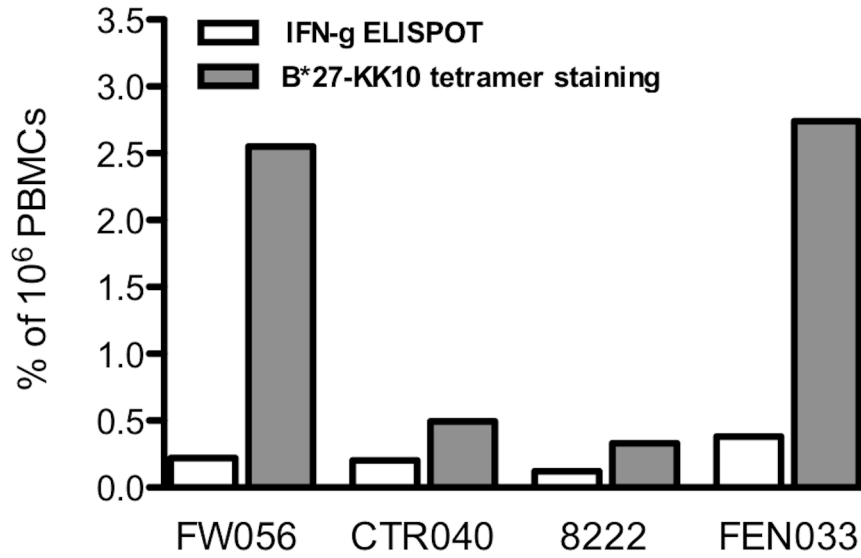

**Supplemental Figure 4.** Comparison of the frequencies of PBMCs specific for the HLA-B\*27-restricted epitope KK10 measured by IFN $\gamma$  ELISpot and CD8<sup>+</sup> T-cells binding B27-KK10 tetramers measured by flow cytometry for four HIV-infected subjects.

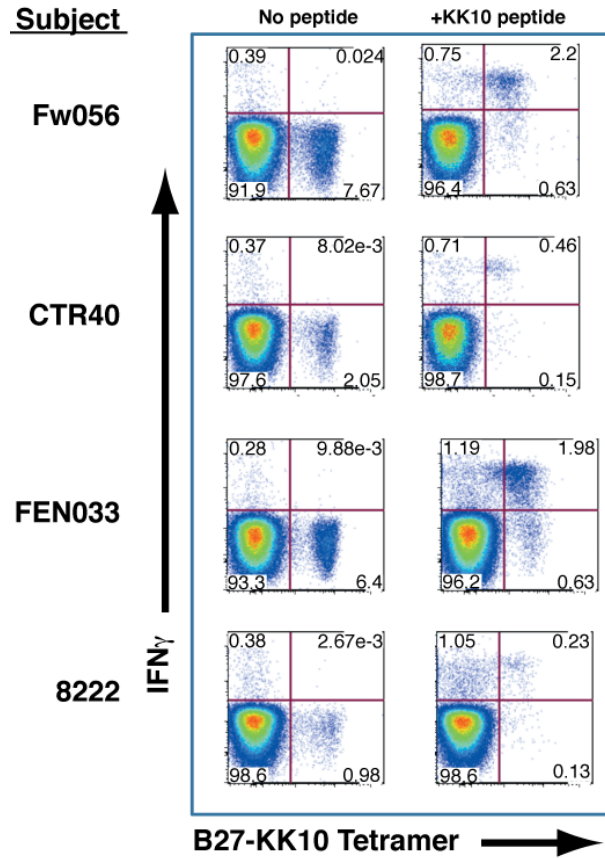

**Supplemental Figure 5. Analysis of intracellular IFN $\gamma$  in KK10 tetramer (+) CD8 $^+$  T-cells of 2 elite controllers and 2 viremic progressors upon stimulation with the cognate peptide.** CD8 $^+$  T-cells were stained with fluorescently labeled tetramers and incubated for 5 h in the presence or absence of KK10 peptide, antibodies against the co-stimulatory molecules CD49d and CD28, and the degranulation-inhibitors Brefeldin A and Monensin.

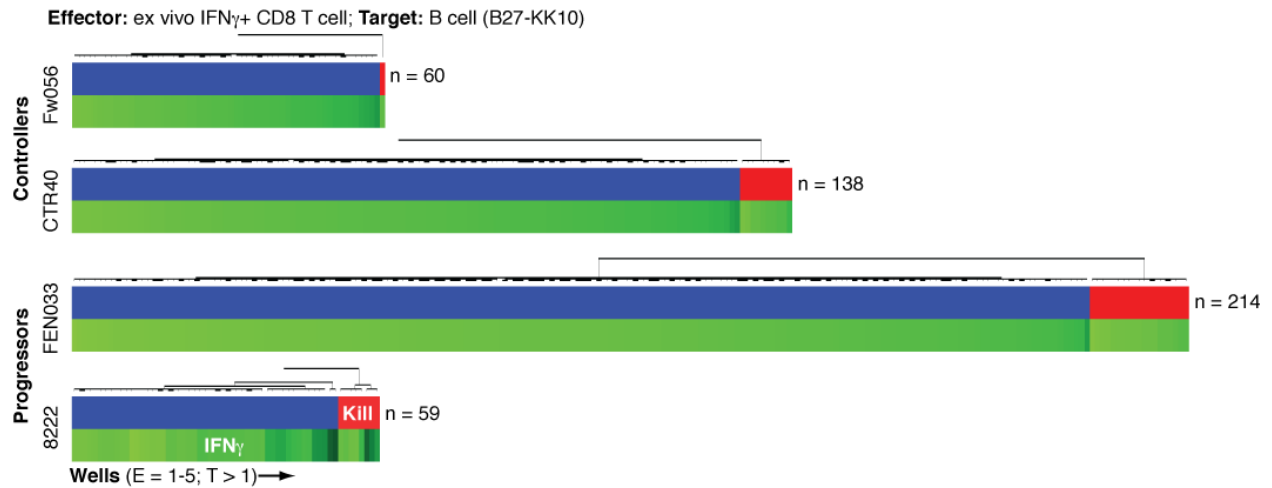

**Supplemental Figure 6.** Matched data for concurrent measurement of cytolysis and IFN $\gamma$  secretion for ex vivo IFN $\gamma$ -secreting CD8+ T-cells from four HIV+ individuals co-incubated in arrays of microwells for 6 h with multiple HLA-matched, KK10-pulsed target B-cells. The data are shown as a heatmap and organized by unsupervised hierarchical clustering (Euclidean distance, complete linkage). Cytolytic activity is shown as discrete values (blue = negative; red = death). The relative rate of secretion is shown for IFN $\gamma$  (green). The dendrograms indicate the relative calculated distances and separation among clusters of wells. The number of wells scored with E = 1-5 and T > 1 with detectable IFN $\gamma$  are indicated for each sample. There were no cells among any of the four samples that released either IL-2 or TNF $\alpha$  at a detectable rate (limit of detection:  $\sim$ 2 molecules/s).



**A**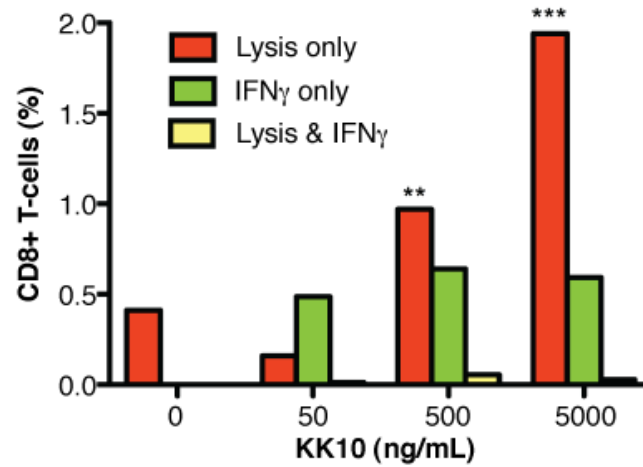**B**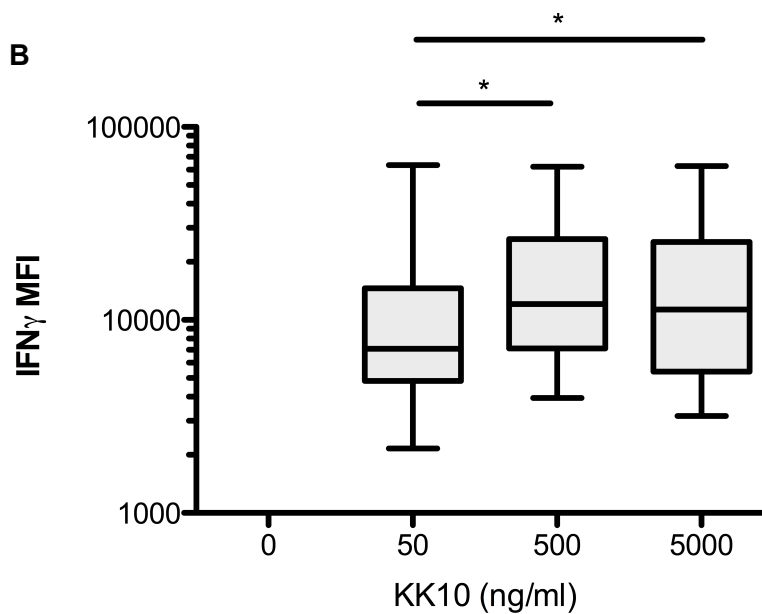

**Supplemental Figure 7.** (A) Functional response of ex vivo CD8+ T-cells (HIV+ controller) to HLA-matched B-cell targets loaded with different doses of KK10 peptide (E = 1-5 : T = 1). The lysis rate is corrected for the background death rate of target cells on the same microwell array (E = 0 : T = 1). \*\*p < 0.01, \*\*\*p < 0.0001 for lysis rate comparison to both on-chip background death rate and 0 ng/ml KK10 killing rate (Fisher's exact test, or, for large numbers of events, chi-squared with Yate's correction). The minimum number of events scored for each condition was  $n = 3,192$ . (B) Boxplot of the relative rates of secretion of IFN $\gamma$  as a function of KK10 concentration (secretors only; E = 1-5 : T = 1). \*p < 0.05, two-tailed t-test.

**Effector:** ex vivo IFN $\gamma$ + CD8+ T-cell; **Target:** B cell (A2-SL9)

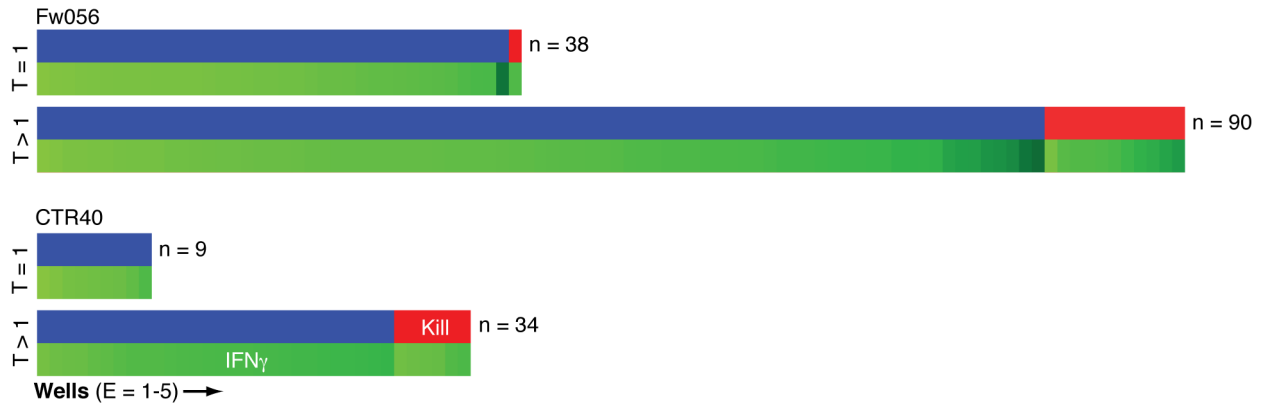

**Supplemental Figure 8.** Matched data for concurrent measurement of cytolysis and IFN $\gamma$  secretion for IFN $\gamma$ -secreting CD8+ T-cells from two HIV+ controllers co-incubated in arrays of microwells for 6 h with HLA-matched (HLA-A2), SL9-pulsed target B-cells. The data are shown as a heatmap and organized by unsupervised hierarchical clustering (Euclidean distance, complete linkage). Cytolytic activity is shown as discrete values (blue = negative; red = death). The relative rate of secretion is shown for IFN $\gamma$  (green). The heatmaps show all wells scored that had IFN $\gamma$  secretion and (top) E:T = 1:1 – 5:1 or (bottom) E = 1-5; T > 1 for each sample (Fw056 and CTR040). There were no cells in either sample that released either IL-2 or TNF $\alpha$  at a detectable rate (limit of detection:  $\sim$ 2 molecules/s).

a) CTR084

Effector: ex vivo CD8+ T-cell; Target: B cell (Gag pool)

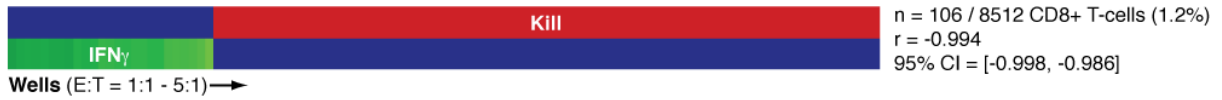

b) Effector: ex vivo IFN $\gamma$ + CD8+ T-cell; Target: B cell (Gag pool)

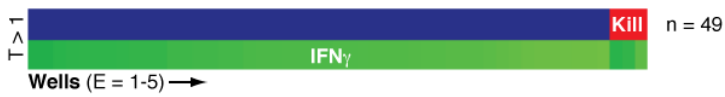

**Supplemental Figure 9.** Matched data for concurrent measurement of cytolysis and IFN $\gamma$  secretion for CD8+ T-cells from an HIV+ controller (CTR084) co-incubated in microwells for 6 h with autologous target B-cells pulsed with overlapping peptides from Gag. The data are shown as a heatmap and organized by unsupervised hierarchical clustering (Euclidean distance, complete linkage). Cytolytic activity is shown as discrete values (blue = negative; red = death). The relative rate of secretion is shown for IFN $\gamma$  (green). (A) All events observed for wells scored with E:T = 1:1 – 5:1 exhibiting any functional activity; (B) All events observed for wells with E = 1-5; T > 1 and IFN $\gamma$  secretion.
